# Supplementary material for: The importance of crystallographic texture in the use of titanium as an orthopedic biomaterial
Source: Royal Society of Chemistry journal article supplement (doi:10.1039/c4ra05440g), 2014-01-01
Supplement: c4ra05440g1.pdf [file c4ra05440g1.pdf]

**Supplementary Information for**  
**The Importance of Crystallographic Texture in the Use of**  
**Titanium as an Orthopedic Biomaterial**

**Sumit Bahl, Satyam Suwas, Kaushik Chatterjee\***

Department of Materials Engineering, Indian Institute of Science, Bangalore, India 560012

**Figure S1**

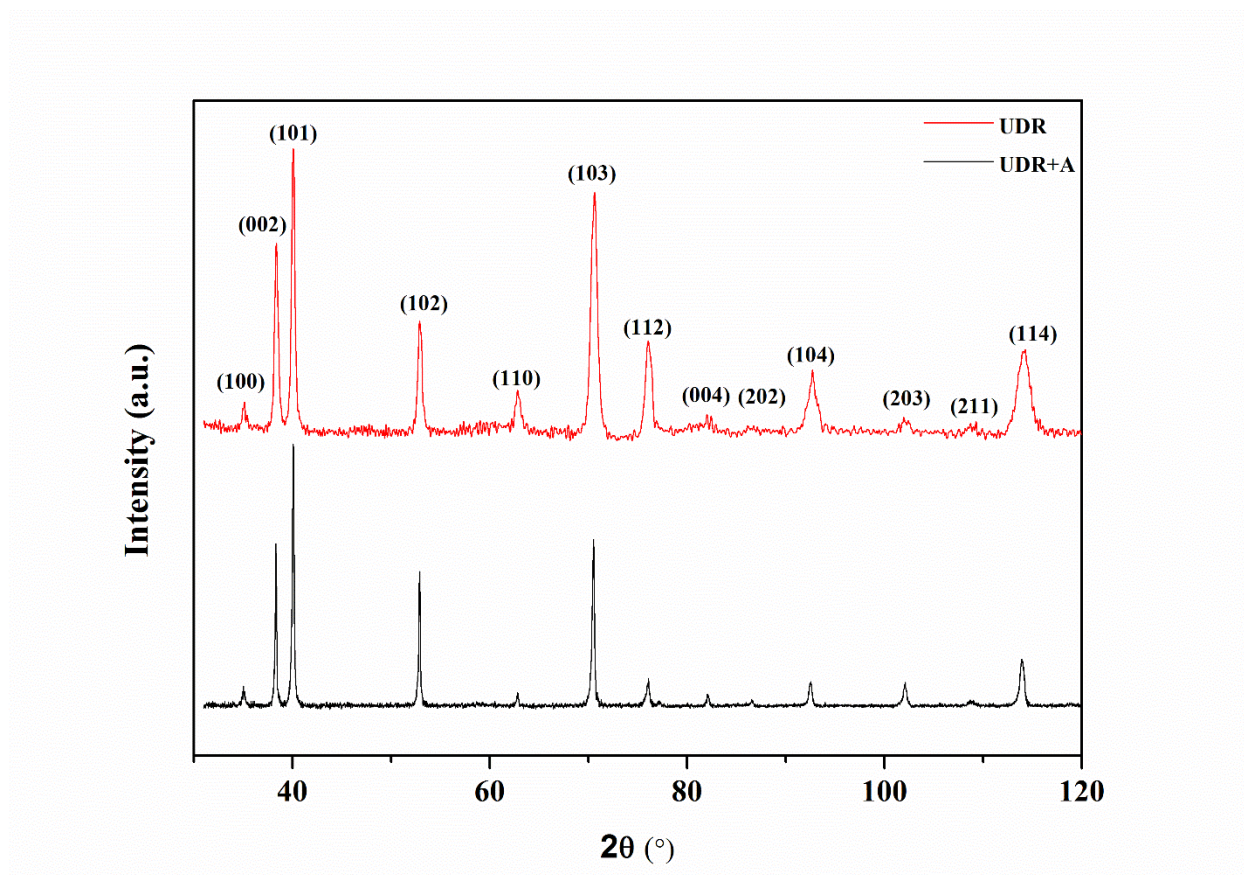

**Figure S1 XRD profiles of UDR and UDR+A samples**

**Figure S2**

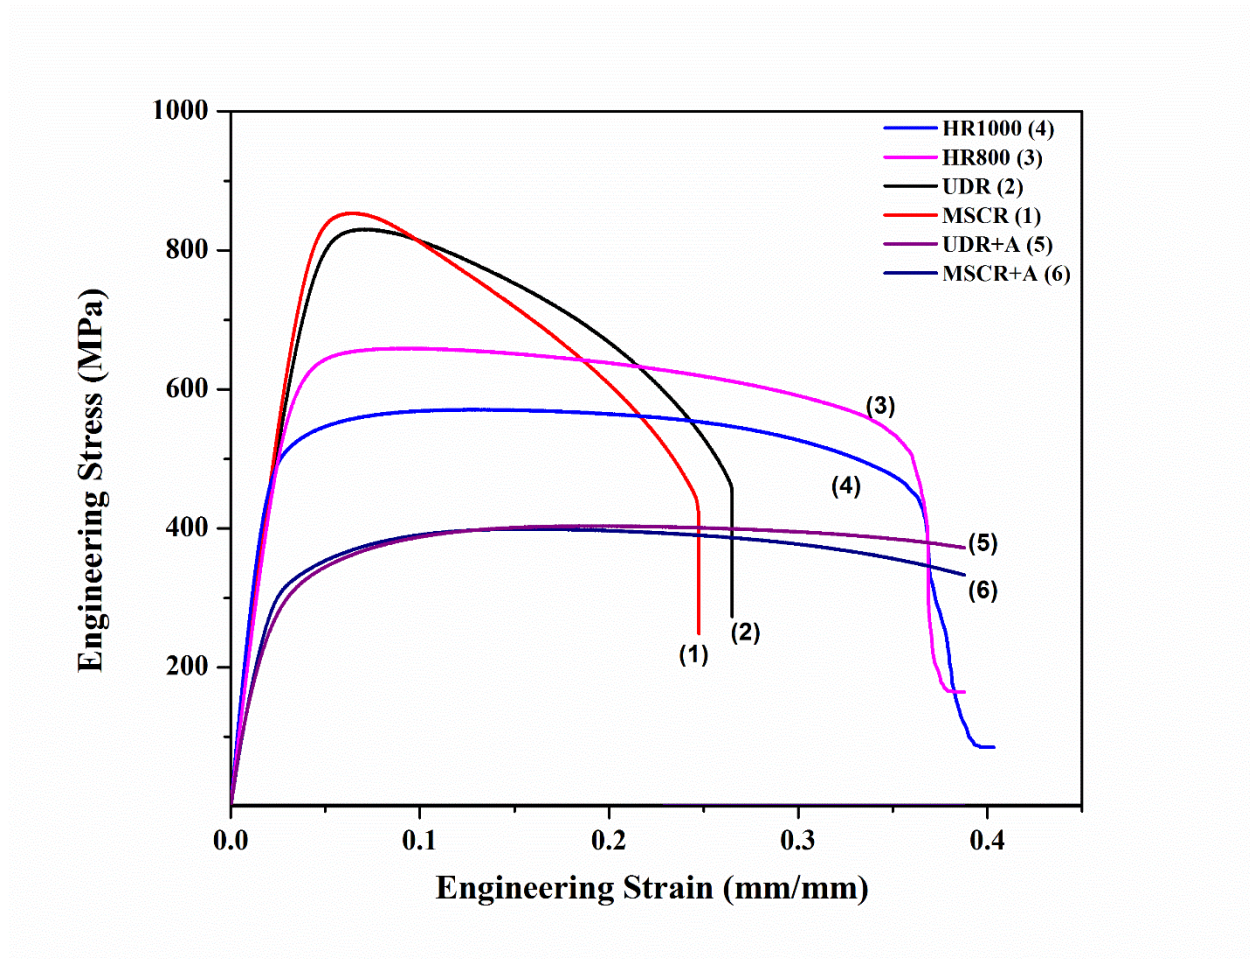

**Figure S2.** Plots for tensile tests of the different cp-Ti samples.

**Figure S3**

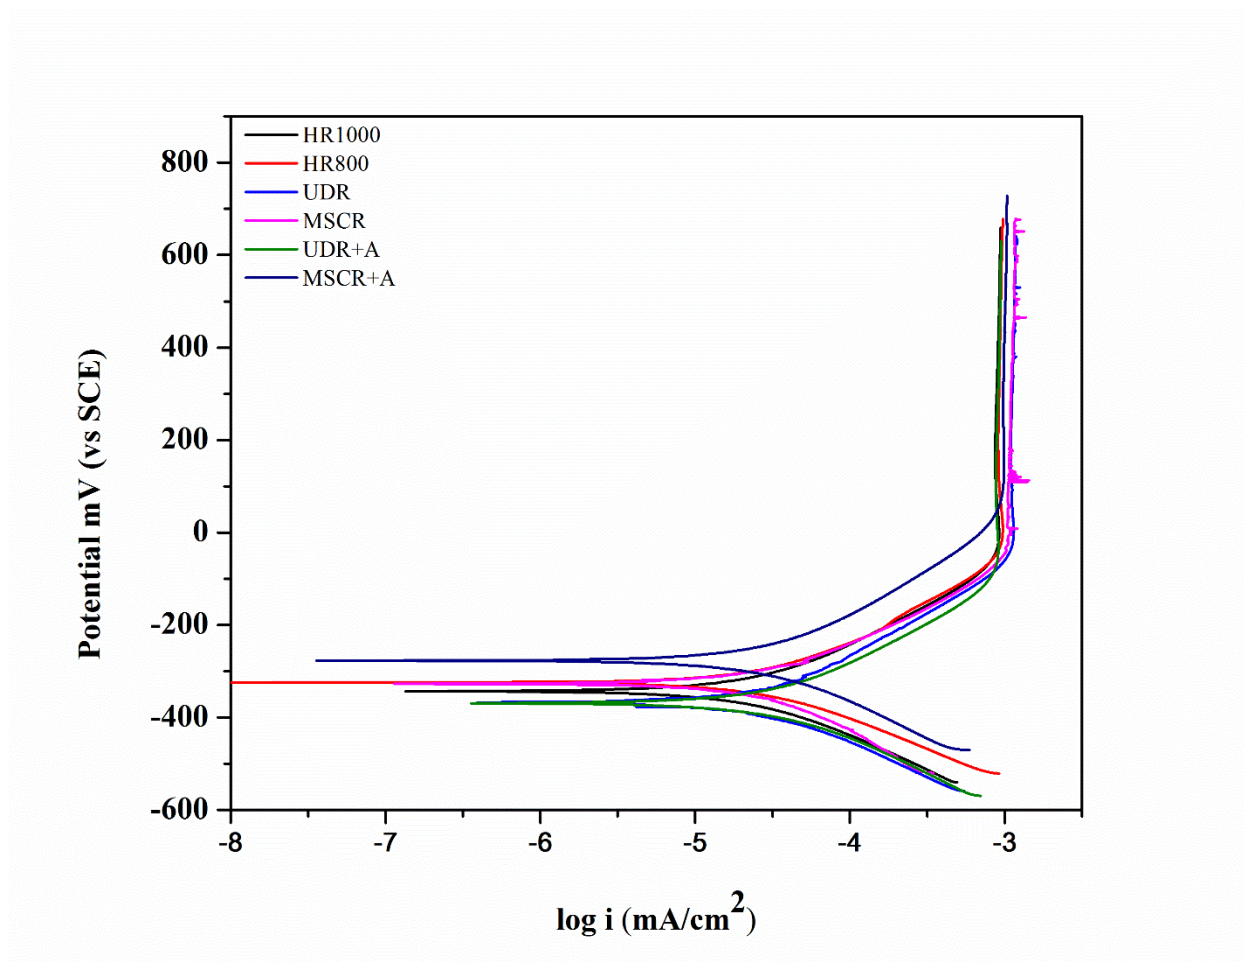

**Figure S3.** Potentiodynamic polarization plots of cp-Ti samples measured in SBF.

**Figure S4**

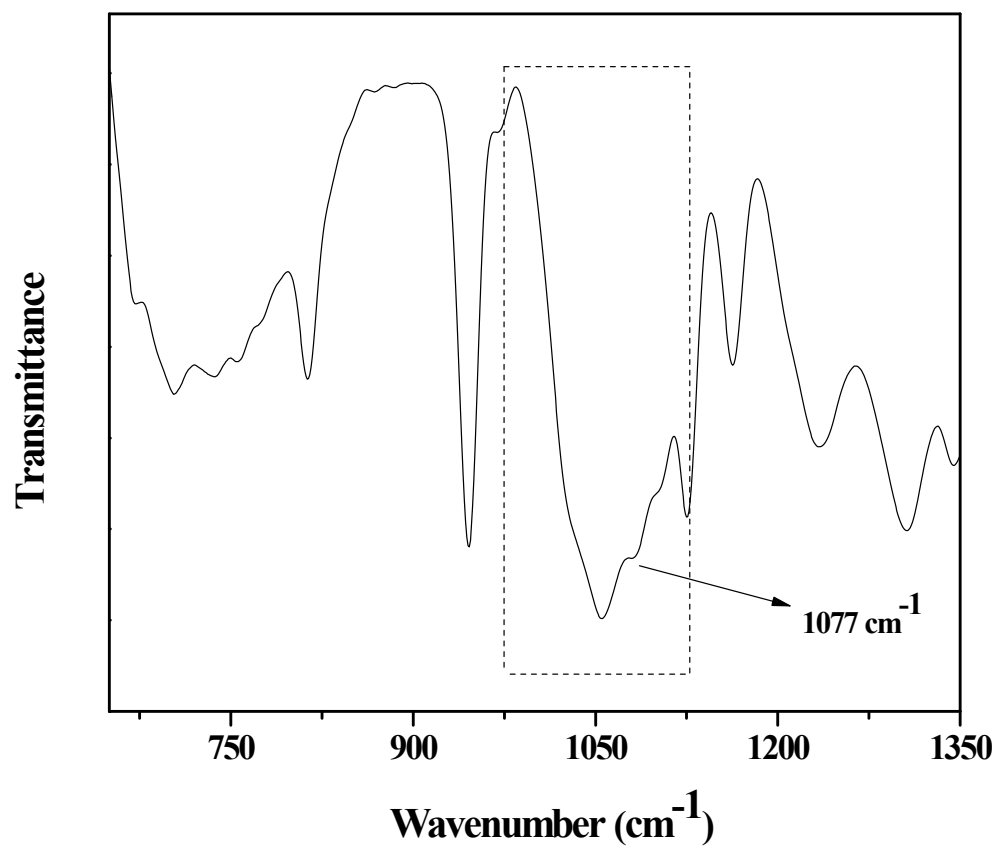

**Figure S4.** Representative FTIR spectrum of MSCR surface with calcium phosphate mineral deposits.
